# Supplementary material for: Identifying regulators of aberrant stem cell and differentiation activity in colorectal cancer using a dual endogenous reporter system
Source: PubMed Central journal article supplement (PMC10933491; doi:10.1038/s41467-024-46285-w), 2024-03-12
Supplement: 41467_2024_46285_MOESM3_ESM.pdf [file 41467_2024_46285_MOESM3_ESM.pdf]

1  
2  
3  
4  
5  
6  
7  
8  
9

## Description of Additional Supplementary Files

### Supplementary Datasets

- Supplementary Data 1.** Sequences of sgRNA and homology arm for SOX9 and KRT20 knock-in
- Supplementary Data 2.** List of 78 epigenetic regulators from 5 families and their associated drugs
- Supplementary Data 3.** List of 76 sgRNAs and 154 shRNAs for control libraries and 542 sgRNAs for the epigenetic library
- Supplementary Data 4.** List of sequences used in the validation
- Supplementary Data 5.** List of antibodies used for the western blot
